# Supplementary material for: An efficient hybrid adsorbent based on silica-supported amino penta-carboxylic acid for water purification
Source: Royal Society of Chemistry journal article supplement (doi:10.1039/c8ta02560f), 2018-01-01
Supplement: c8ta02560f1.pdf [file c8ta02560f1.pdf]

## **Supporting information**

# An Efficient Hybrid Adsorbent Based on Silica-Supported Amino *Penta*-Carboxylic Acid for Water Purification

Smaail Radi,<sup>\*a</sup> Chahrazad El Abiad,<sup>a</sup> André P. Carvalho,<sup>b</sup> Sérgio M. Santos,<sup>b</sup> M. Amparo F. Faustino,<sup>c</sup> M. Graça P. M. S. Neves,<sup>c</sup> Nuno M. M. Moura,<sup>\*c</sup>

<sup>a</sup> *Laboratory of Applied Chemistry and Environment (LCAE), Department of Chemistry, Faculty of Sciences, University Mohamed Premier, Oujda, Morocco. Email: s.radi@ump.ac.ma*

<sup>b</sup> *CICECO - Aveiro Institute of Materials, Department of Chemistry, University of Aveiro, 3810-193 Aveiro, Portugal.*

<sup>c</sup> *QOPNA and Department of Chemistry, University of Aveiro, 3810-193 Aveiro, Portugal. Email: nmoura@ua.pt*

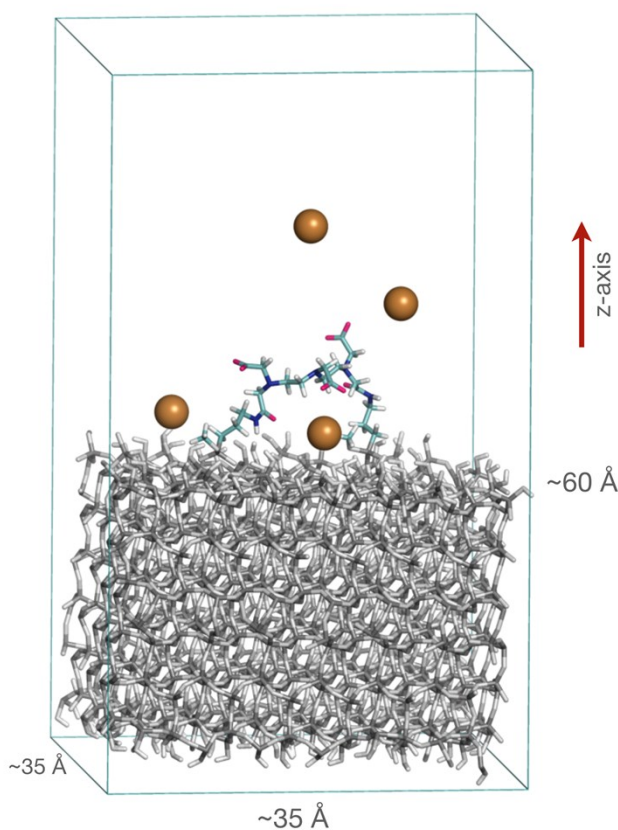

**Figure S1.** General aspect of the SiDTPA simulation box, comprising the silica substrate (grey-scale sticks), the DTPA bridge (coloured sticks) and the Cu<sup>2+</sup> cations (orange spheres). The water molecules, filling the remaining empty space, were removed for the sake of clarity. Scaling of the simulation box during pressure control was restricted to the z-axis (red arrow)

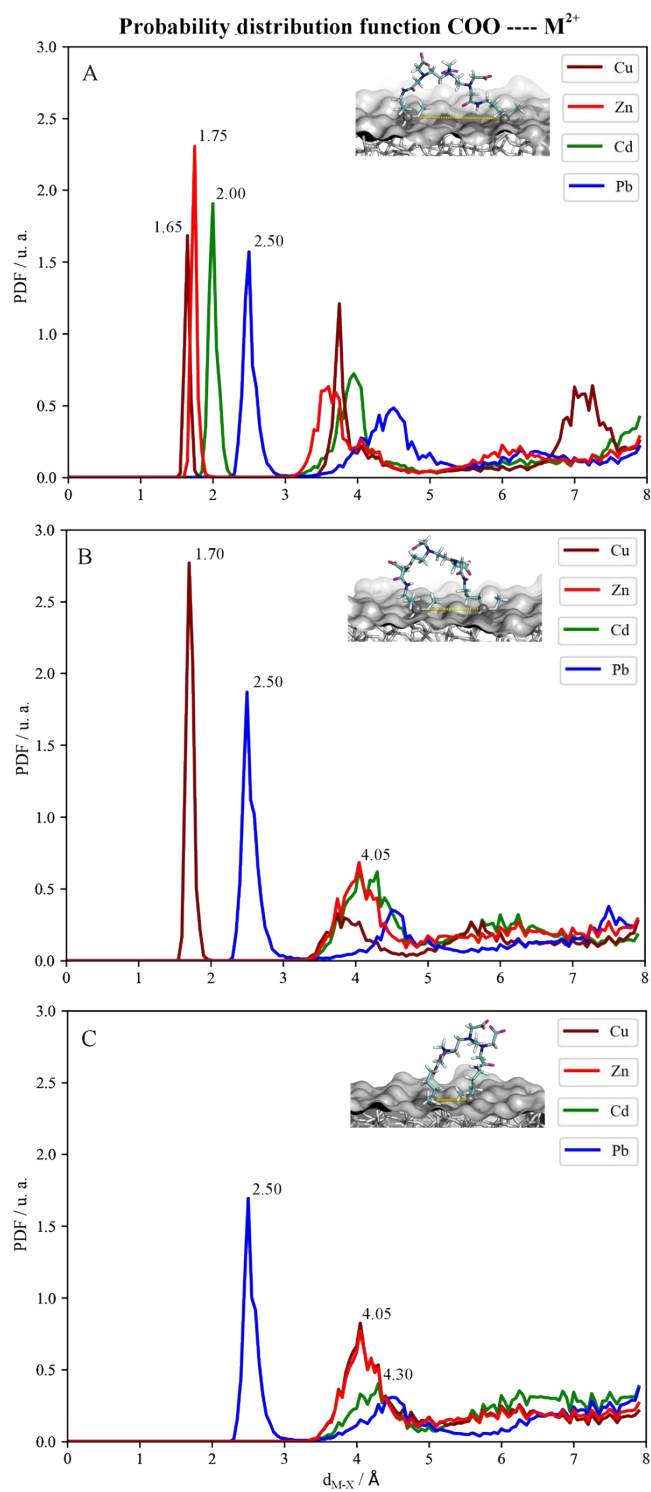

**Figure S2.** Probability distribution functions for the CO<sub>2</sub><sup>-</sup> ... M<sup>2+</sup> distance in structures S1, S2 and S3 (top, middle and bottom, respectively)

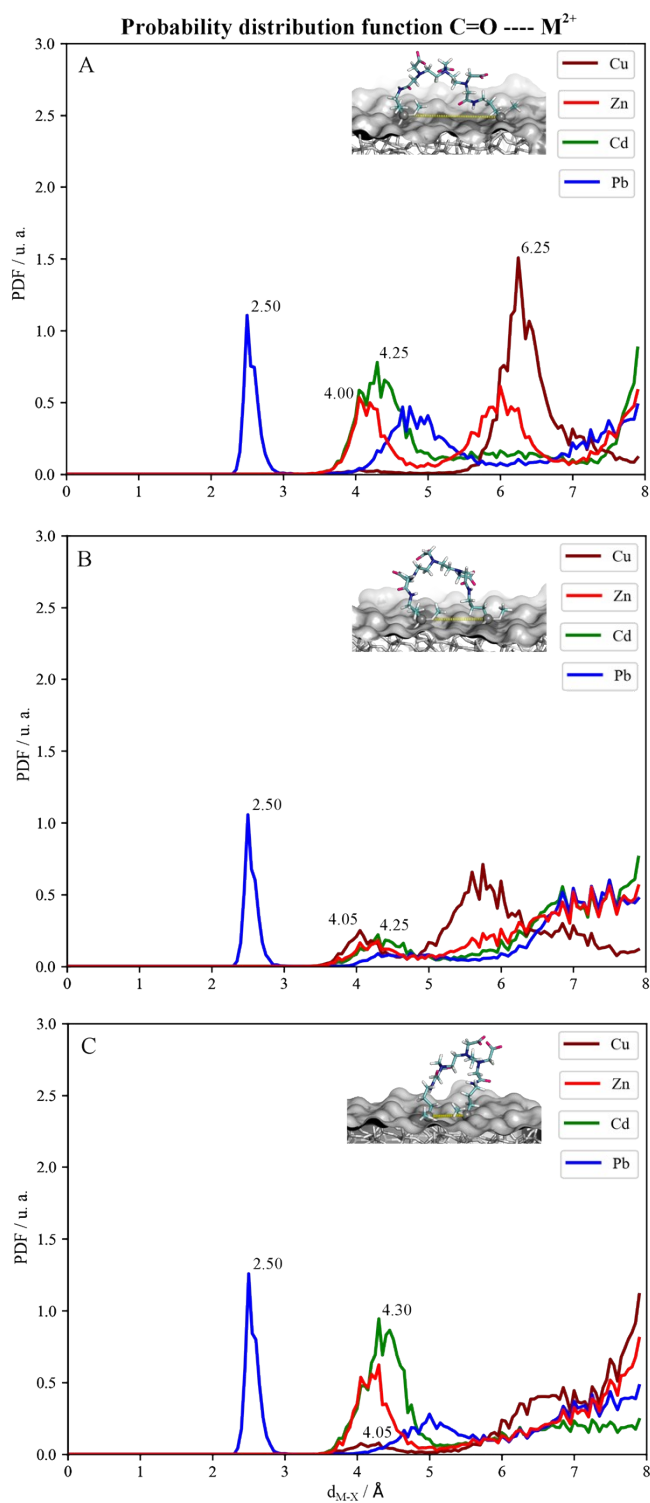

**Figure S3.** Probability distribution functions for the C=O ... M<sup>2+</sup> distance in structures S1, S2 and S3 (top, middle and bottom, respectively). Only Pb mildly interacts with the carbonylic oxygens in structure S3 (shorter distance between anchoring points).

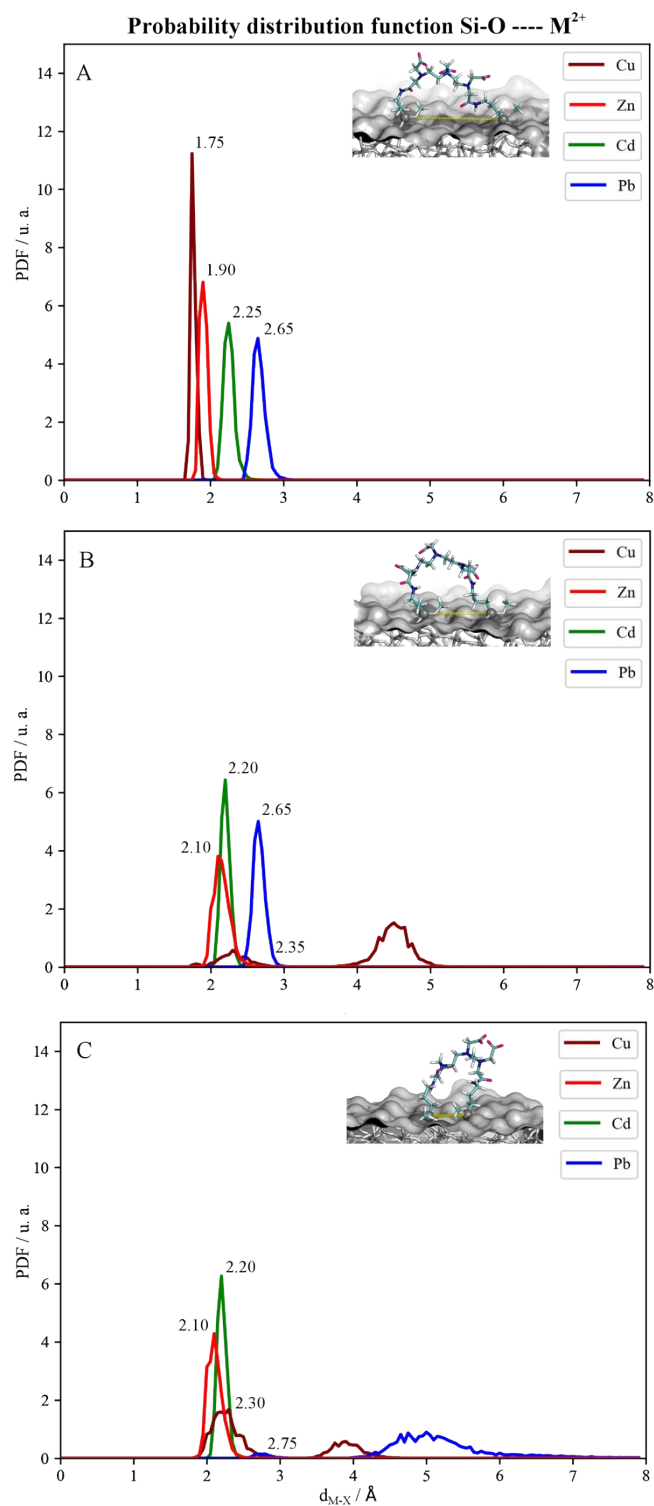

**Figure S4.** Probability distribution functions for the Si-O<sup>-</sup> ... M<sup>2+</sup> distance in structures S1, S2 and S3 (top, middle and bottom, respectively). The position of the Si-O<sup>-</sup> site under analysis is depicted in Figure S5.

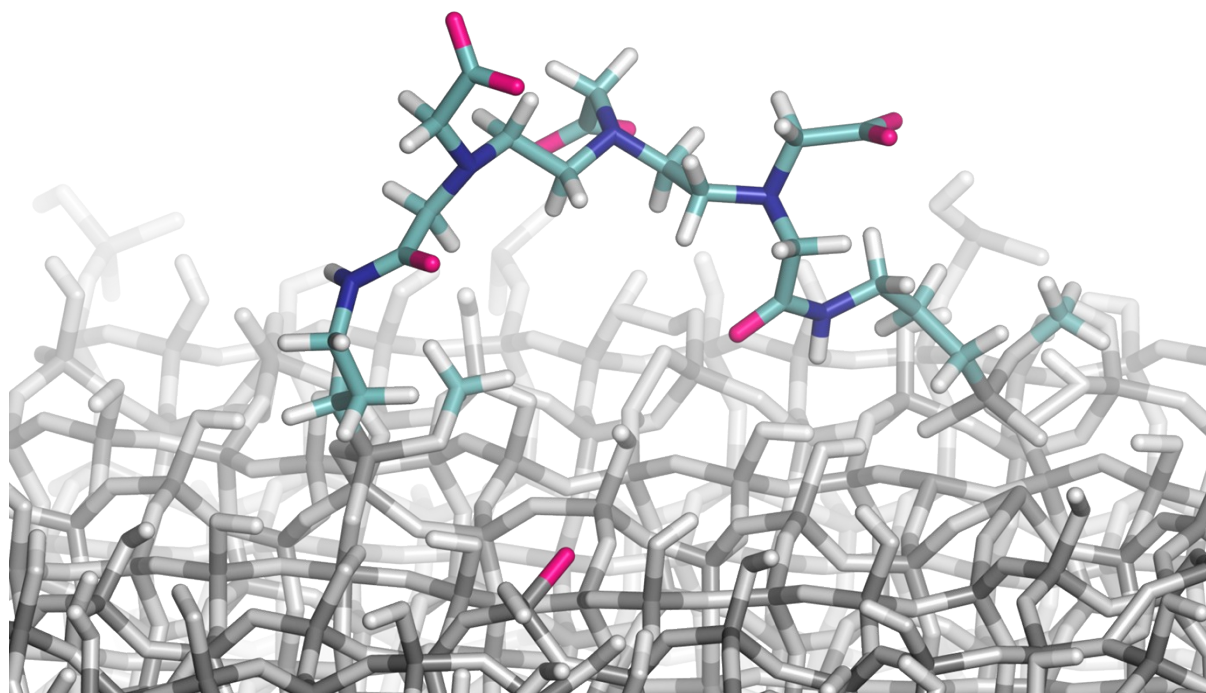

**Figure S5.** Location of the Si-O<sup>-</sup> binding site (bottom pink stick) relative to the anchoring position of DTPA in structure S1 (relative location in structures S2 and S3 is similar).
